# Supplementary information 2

## Genotyping methods

### Subantarctic fur seal

A total of 88 *Arctocephalus tropicalis* samples were collected from Macquarie Island. Total genomic DNA was extracted from each sample using a standard phenol-chloroform protocol (Sambrook et al 1989) and genotyped at 36 microsatellite loci (see Supplementary Table 9 for details). These were PCR amplified in 5 separate multiplexed reactions using a Type It Kit (Qiagen) as described in Supplementary Table 9. The following PCR profile was used: one cycle of 5 min at 94 °C; 24 cycles of 30 s at 94 °C, 90 s at T<sub>a</sub> °C and 30 s at 72 °C; and one final cycle of 15 min at 72 °C (see Table S1 for T<sub>a</sub>). Fluorescently labeled PCR products were then resolved by electrophoresis on an ABI 3730xl capillary sequencer and allele sizes were scored automatically using GeneMarker v1.95. To ensure high genotype quality, all traces were manually inspected and any incorrect calls were adjusted accordingly.

| Locus      | Literature source                 | Multiplex | T <sub>a</sub> (°C) |
|------------|-----------------------------------|-----------|---------------------|
| Pv9        | Allen et al. (1995)               | 1         | 53                  |
| Hg6.3      | Allen et al. (1995)               | 1         | 53                  |
| Hg8.10     | Allen et al. (1995)               | 1         | 53                  |
| Hg1.3      | Gemmell et al. (1997)             | 1         | 53                  |
| M11a       | Hoelzel et al. (1999)             | 1         | 53                  |
| PvcA       | Coltman et al. (1996)             | 1         | 53                  |
| ZcwB07     | Hoffman et al. (2007)             | 1         | 53                  |
| Agaz2      | Hoffman (2009)                    | 1         | 53                  |
| Ag3        | Hoffman et al. (2008)             | 2         | 60                  |
| Agaz6      | Hoffman (2009)                    | 2         | 60                  |
| Ag2        | Hoffman et al. (2008)             | 2         | 60                  |
| OrrFCB2    | Buchanan et al. (1998)            | 2         | 60                  |
| Lw10       | Davis et al. (2002)               | 2         | 60                  |
| ZcwCo1     | Hoffman et al. (2007)             | 2         | 60                  |
| Agaz5      | Hoffman (2009)                    | 2         | 60                  |
| ZcCgDhB.14 | Hernandez-Velazquez et al. (2005) | 2         | 60                  |
| Ag7        | Hoffman et al. (2008)             | 3         | 60                  |
| Agt10      | Hoffman and Nichols (2011)        | 3         | 60                  |
| ZcCgDh4.7  | Hernandez-Velazquez et al. (2005) | 3         | 60                  |
| ZcwE05     | unpublished                       | 3         | 60                  |
| Ag1        | Hoffman et al. (2008)             | 3         | 60                  |
| OrrFCB8    | Buchanan et al. (1998)            | 3         | 60                  |
| Agt47      | Hoffman and Nichols (2011)        | 3         | 60                  |
| ZcwFo7     | Hoffman et al. (2007)             | 4         | 53                  |
| ZcwDo2     | Wolf et al. (2006)                | 4         | 53                  |
| ZcCgDh1.8  | Hernandez-Velazquez et al. (2005) | 4         | 53                  |
| Aa4        | Hoelzel et al. (1999)             | 4         | 53                  |
| ZcCgDh5.8  | Hernandez-Velazquez et al. (2005) | 4         | 53                  |
| Agaz3      | Hoffman (2009)                    | 4         | 53                  |
| 962-1      | unpublished                       | 5         | 60                  |
| 554-6      | unpublished                       | 5         | 60                  |

|        |                       |   |    |
|--------|-----------------------|---|----|
| ZcwA12 | Hoffman et al. (2007) | 5 | 60 |
| PvcE   | Coltman et al. (1996) | 5 | 60 |
| ZcwBo9 | Wolf et al. (2006)    | 5 | 60 |
| Agaz10 | Hoffman (2009)        | 5 | 60 |
| Mang36 | Sanvito et al. (2013) | 5 | 60 |

**Supplementary Table 9: Microsatellite loci of the Subantarctic fur seal.** “Multiplex” denotes the PCR mastermix into which each locus was multiplexed and “T<sub>a</sub>” denotes the annealing temperature used.

- Allen, P. J., W. Amos, P. P. Pomeroy, and S. D. Twiss. 1995. “Microsatellite Variation in Grey Seals (*Halichoerus Grypus*) Shows Evidence of Genetic Differentiation between Two British Breeding Colonies.” *Molecular Ecology* 4 (6): 653–62. <https://doi.org/10.1111/j.1365-294X.1995.tb00266.x>.
- Buchanan, F. C., L. D. Maiers, T. D. Thue, B. G. De March, and R. E. Stewart. 1998. “Microsatellites from the Atlantic Walrus *Odobenus Rosmarus Rosmarus*.” *Molecular Ecology* 7 (8): 1083–85.
- Coltman, D. W., W. Don Bowen, and J. M. Wright. 1996. “PCR Primers for Harbour Seal (*Phoca Vitulina Concolour*) Microsatellites Amplify Polymorphic Loci in Other Pinniped Species.” *Molecular Ecology* 5 (1): 161–63. <https://doi.org/10.1111/j.1365-294X.1996.tb00303.x>.
- Davis, C. S., T. S. Gelatt, D. Siniff, and C. Strobeck. 2002. “Dinucleotide Microsatellite Markers from the Antarctic Seals and Their Use in Other Pinnipeds.” *Molecular Ecology Notes* 2 (3): 203–8. <https://doi.org/10.1046/j.1471-8286.2002.00187.x-i2>.
- Gemmell, N. J., P. J. Allen, S. J. Goodman, and J. Z. Reed. 1997. “Interspecific Microsatellite Markers for the Study of Pinniped Populations.” *Molecular Ecology* 6 (7): 661–66. <https://doi.org/10.1046/j.1365-294X.1997.00235.x>.
- Hernandez-Velazquez, F. D., C. E. Galindo-Sanchez, M. I. Taylor, J. De La Rosa-Velez, I. M. Cote, Y. Schramm, D. Auriolles-Gamboa, and C. Rico. 2005. “New Polymorphic Microsatellite Markers for California Sea Lions (*Zalophus Californianus*).” *Molecular Ecology Notes* 5 (1): 140–42. <https://doi.org/10.1111/j.1471-8286.2004.00858.x>.
- Hoelzel, A. R., Burney J. Le Boeuf, Joanne Reiter, and Claudio Campagna. 1999. “Alpha-Male Paternity in Elephant Seals.” *Behavioral Ecology and Sociobiology* 46 (5): 298–306. <https://doi.org/10.1007/s002650050623>.
- Hoffman, Joseph I. 2009. “A Panel of New Microsatellite Loci for Genetic Studies of Antarctic Fur Seals and Other Otariids.” *Conservation Genetics* 10 (4): 989–92. <https://doi.org/10.1007/s10592-008-9669-z>.
- Hoffman, Joseph I., Kanchon K. Dasmahapatra, and Hazel J. Nichols. 2008. “Ten Novel Polymorphic Dinucleotide Microsatellite Loci Cloned from the Antarctic Fur Seal *Arctocephalus Gazella*.” *Molecular Ecology Resources* 8 (2): 459–61. <https://doi.org/10.1111/j.1471-8286.2007.01993.x>.
- Hoffman, Joseph I., and Hazel J. Nichols. 2011. “A Novel Approach for Mining Polymorphic Microsatellite Markers In Silico.” *PLOS ONE* 6 (8): e23283. <https://doi.org/10.1371/journal.pone.0023283>.
- Hoffman, Joseph I., Sebastian Steinfartz, and Jochen B. W. Wolf. 2007. “Ten Novel Dinucleotide Microsatellite Loci Cloned from the Galápagos Sea Lion (*Zalophus Californianus Wollebaeki*) Are Polymorphic in Other Pinniped Species.” *Molecular Ecology Notes* 7 (1): 103–5. <https://doi.org/10.1111/j.1471-8286.2006.01544.x>.
- Sanvito, Simona, Alejandro Dueñes Meza, Yolanda Schramm, Pedro Cruz Hernández, Yareli Esquer Garrigos, and Filippo Galimberti. 2013. “Isolation and Cross-Species Amplification of Novel Microsatellite Loci in a Charismatic Marine Mammal Species, the Northern Elephant Seal (*Mirounga Angustirostris*).” *Conservation Genetics Resources* 5 (1): 93–96. <https://doi.org/10.1007/s12686-012-9741-3>.
- Wolf, Jochen B.W., Diethard Tautz, Adalgisa Caccone, and Sebastian Steinfartz. 2006. “Development of New Microsatellite Loci and Evaluation of Loci from Otherpinniped Species for the Galápagos Sea Lion (*Zalophus Californianus Wollebaeki*).” *Conservation Genetics* 7 (3): 461–65. <https://doi.org/10.1007/s10592-005-9045-1>.

## Northern elephant seal

A total of 260 *Mirounga angustirostris* samples were collected in the southernmost breeding colony of the species, the Islas San Benito (Baja California, Mexico). Total genomic DNA was extracted from each sample using silica-gel-membrane technology (DNeasy Blood and Tissue kit, Qiagen; details in Sanvito et al. 2014) and genotyped at 35 microsatellite loci (see Supplementary Table Supplementary Table 10 for details). Amplification by PCR was carried out using the “universal tag” method of Schuelke (2000). The microsatellite loci were amplified in singleplex or multiplex reactions as described in Supplementary Table 10. The following PCR profile was used: one cycle of 3 min at 94 °C; 30 cycles of 30 s at 94 °C, 30 s at  $T_a$  °C and 40 s at 72 °C; 8 cycles of 30 s at 94 °C, 30 s at 47 °C and 40 s at 72 °C; and one final cycle of 10 min at 72 °C (see Supplementary Table 10 for  $T_a$ ). Magnesium concentrations varied among the mastermixes as shown in Supplementary Table 10. Fluorescently labelled PCR products were resolved by electrophoresis on an ABI 3730xl capillary sequencer and allele sizes were scored automatically using GeneMarker v1.85. To ensure high genotype quality, all traces were manually inspected and any incorrect calls were adjusted accordingly.

| Locus     | Literature source                            | Multiplex | Mg (mM) | $T_a$ (°C) |
|-----------|----------------------------------------------|-----------|---------|------------|
| 71HDZ441  | Huebinger et al. (2007)                      | –         | 1.5     | 54         |
| Hg4.2     | Allen et al. (1995)                          | –         | 1.5     | 56         |
| Hg8.9     | Allen et al. (1995)                          | –         | 2       | 48         |
| Lw-16     | Davis et al. (2002)                          | –         | 1.5     | 55         |
| Lw-20     | Davis et al. (2002)                          | –         | 1.5     | 49         |
| Lw-8      | Davis et al. (2002)                          | –         | 1.5     | 47         |
| PVC26     | Coltman et al. (1996)                        | –         | 2       | 40         |
| PVC74     | Coltman et al. (1996)                        | –         | 2       | 53         |
| ZcCgDh4.7 | Hernandez-Velazquez et al. (2005)            | –         | 1.75    | 56         |
| ZcCgDh7tg | Hernandez-Velazquez et al. (2005)            | –         | 2       | 46         |
| ZcwCo3    | Wolf et al. (2006)                           | –         | 1.5     | 56         |
| ZcwEo3    | Wolf et al. (2006)                           | –         | 1.5     | 54         |
| Hg1.4     | Gemmel et al. (1997)                         | 1         | 1.5     | 53         |
| Lw-18     | Davis et al. (2002)                          | 1         | 1.5     | 53         |
| BG        | R. Slade, pers. comm. in Gemmel et al (1997) | 2         | 2       | 53         |
| PV9       | Goodman (1997)                               | 2         | 2       | 53         |
| Hg3.6     | Allen et al. (1995)                          | 3         | 1.75    | 56         |
| Hg8.10    | Allen et al. (1995)                          | 3         | 1.75    | 56         |
| Hl10      | Gelatt et al. (2010)                         | 4         | 2       | 39         |
| ZzCgDh3.6 | Hernandez-Velazquez et al. (2005)            | 4         | 2       | 39         |
| Hg2.3     | Garza (1998)                                 | 5         | 2       | 53         |
| Hl-8      | Davis et al. (2002)                          | 5         | 2       | 53         |
| MA11A     | Hoelzel (unpubl) in Gemmel et al. (1997)     | 5         | 2       | 53         |
| CORT      | Garza (1998)                                 | 6         | 1.75    | 51         |
| PVC43     | Garza (1998)                                 | 6         | 1.75    | 51         |
| Lw-10     | Davis et al. (2002)                          | 7         | 1.5     | 52         |
| PVC1      | Garza (1998)                                 | 7         | 1.5     | 52         |
| 71HDZ301  | Huebinger et al. (2007)                      | 8         | 1.5     | 42         |
| ZzCgDh1.8 | Hernandez-Velazquez et al. (2005)            | 8         | 1.5     | 42         |
| ZcwA12    | Hoffman et al. (2007)                        | 9         | 1.75    | 49         |
| ZcwFo7    | Hoffman et al. (2007)                        | 9         | 1.75    | 49         |
| Ag-9      | Hoffman et al. (2008)                        | 10        | 2       | 57         |
| ZcwCo1    | Hoffman et al. (2007)                        | 10        | 2       | 57         |
| ZcwEo4    | Hoffman et al. (2007)                        | 11        | 2       | 52         |
| ZcwGo4    | Hoffman et al. (2007)                        | 11        | 2       | 52         |

Supplementary Table 10: Microsatellite loci of the Northern elephant seal. “Multiplex” denotes the PCR mastermix into which each locus was multiplexed, “Mg” denotes the concentration of magnesium used in the

PCR mastermix and “T<sub>a</sub>” denotes the annealing temperature used. Loci not assigned to PCR multiplexes were amplified individually.

- Allen, P. J., W. Amos, P. P. Pomeroy, and S. D. Twiss. 1995. “Microsatellite Variation in Grey Seals (*Halichoerus grypus*) Shows Evidence of Genetic Differentiation between Two British Breeding Colonies.” *Molecular Ecology* 4 (6): 653–62. <https://doi.org/10.1111/j.1365-294X.1995.tb00266.x>.
- Coltman, D. W., W. D. Bowen and J. M. Wright. 1996. “PCR primers for harbour seal (*Phoca vitulina concolour*) microsatellites amplify polymorphic loci in other pinniped species.” *Molecular Ecology* 5(1): 161-3. <http://dx.doi.org/10.1111/j.1365-294X.1996.tb00303.x>.
- Davis, C. S., T. S. Gelatt, D. Siniff, and C. Strobeck. 2002. “Dinucleotide Microsatellite Markers from the Antarctic Seals and Their Use in Other Pinnipeds.” *Molecular Ecology Notes* 2 (3): 203–8. <https://doi.org/10.1046/j.1471-8286.2002.00187.x-i2>.
- Garza, J. C. 1998. “Population genetics of the Northern elephant seal.” PhD thesis, Department of Biology, University of California, Berkeley, California.
- Gelatt, T. S., C. S. Davis, I. Stirling, D. B. Siniff, C. Strobeck and I. Delisle. 2010. “History and fate of a small isolated population of Weddell seals at White Island, Antarctica.” *Conservation Genetics* 11(3): 721-35. <https://doi.org/10.1007/s10592-009-9856-6>.
- Gemmell, N. J., P. J. Allen, S. J. Goodman and J. Z. Reed. 1997. “Interspecific microsatellite markers for the study of pinniped populations.” *Molecular Ecology* 6(7): 661-6. <http://dx.doi.org/10.1046/j.1365-294X.1997.00235.x>.
- Goodman, S. J. 1997. “Dinucleotide repeat polymorphisms at seven anonymous microsatellite loci cloned from the European harbour seal (*Phoca vitulina vitulina*).” *Animal Genetics* 28(4): 310-1. <http://dx.doi.org/10.1111/j.1365-2052.1997.tb00011.x>.
- Hernandez-Velazquez, F. D., C. E. Galindo-Sanchez, M. I. Taylor, J. De La Rosa-Velez, I. M. Cote, Y. Schramm, D. Auriolos-Gamboa and C. Rico. 2005. “New polymorphic microsatellite markers for California sea lions (*Zalophus californianus*).” *Molecular Ecology Notes* 5(1): 140-2. <https://doi.org/10.1111/j.1471-8286.2004.00858.x>.
- Hoffman, J. I., S. Steinfartz and J. B. W. Wolf. 2007. “Ten novel dinucleotide microsatellite loci cloned from the Galapagos sea lion (*Zalophus californianus wollebaeki*) are polymorphic in other pinniped species.” *Molecular Ecology Notes* 7(1): 103-5. <https://doi.org/10.1111/j.1471-8286.2006.01544.x>.
- Hoffman, J. I., K. K. Dasmahapatra and H. J. Nichols. 2008. “Ten novel polymorphic dinucleotide microsatellite loci cloned from the Antarctic fur seal *Arctocephalus gazella*.” *Molecular Ecology Resources* 8(2): 459-61. <https://doi.org/10.1111/j.1471-8286.2007.01993.x>.
- Huebinger, R. M., E. E. Louis, T. Gelatt, L. D. Rea and J. W. Bickham. 2007. “Characterization of eight microsatellite loci in Steller sea lions (*Eumetopias jubatus*).” *Molecular Ecology Notes* 7(6): 1097-99. <https://doi.org/10.1111/j.1471-8286.2007.01790.x>.
- Sanvito, S., A. Fabiani and F. Galimberti. 2014. “Sex Determination in the Near Threatened Guadalupe Fur Seal: Molecular Markers and Their Potential Applications.” *Open Journal of Animal Sciences* 4: 270-7. <http://dx.doi.org/10.4236/ojas.2014.45034>.
- Schuelke, M. 2000. “An economic method for the fluorescent labeling of PCR fragments.” *Nature Biotechnology* 18(2): 233-4. <http://dx.doi.org/10.1038/72708>.
- Wolf, J., D. Tautz, A. Caccone and S. Steinfartz. 2006. Development of new microsatellite loci and evaluation of loci from other pinniped species for the Galápagos sea lion (*Zalophus californianus wollebaeki*). *Conservation Genetics* 7(3): 461-5. <http://dx.doi.org/10.1007/s10592-005-9045-1>.

## Southern elephant seal

A total of 260 *Mirounga leonina* samples were collected at Sea Lion Island, the main breeding colony of the species in the Falkland Islands. Total genomic DNA was extracted from each sample using silica-gel-membrane technology (DNeasy Blood and Tissue kit, Qiagen; details in Sanvito et al. 2014) and genotyped at 13 microsatellite loci (see Supplementary Table 11 for details). Amplification by PCR was carried out using the “universal tag” method of Schuelke (2000). The microsatellite loci were amplified in singleplex or multiplex reactions as described in Supplementary Table 11. The following PCR profile was used: one cycle of 3 min at 94 °C; 30 cycles of 30 s at 94 °C, 30 s at T<sub>a</sub> °C and 40 s at 72 °C; 8 cycles of 30 s at 94 °C, 30 s at 47 °C and 40 s at 72 °C; and one final cycle of 10 min at 72 °C (see Supplementary Table 11 for T<sub>a</sub>). Magnesium concentrations varied among the mastermixes as shown in Supplementary Table 11. Fluorescently labelled PCR products were then resolved by electrophoresis on an ABI 3730xl capillary sequencer and allele sizes were scored automatically using GeneMarker v1.85. To ensure high genotype quality, all traces were manually inspected and any incorrect calls were adjusted accordingly.

| Locus     | Literature source                 | Multiplex | Mg (mM) | T <sub>a</sub> (°C) |
|-----------|-----------------------------------|-----------|---------|---------------------|
| ZcwGo4    | Hoffman et al. (2007)             |           | 1.5     | 54                  |
| Lw-20     | Davis et al. (2002)               | 1         | 2       | 49                  |
| OrrFCB9   | Buchanan et al. (1998)            | 1         | 2       | 49                  |
| 71HDZ441  | Huebinger et al. (2007)           | 2         | 1.8     | 56                  |
| Ag-8      | Hoffman et al. (2008)             | 2         | 1.8     | 56                  |
| Hg3.6     | Allen et al. (1995)               | 3         | 1.75    | 58                  |
| Hg8.10    | Allen et al. (1995)               | 3         | 1.75    | 58                  |
| ZcwA12    | Hoffman et al. (2007)             | 4         | 2       | 54                  |
| ZcwFo7    | Hoffman et al. (2007)             | 4         | 2       | 54                  |
| 71HDZ301  | Huebinger et al. (2007)           | 5         | 1.5     | 42                  |
| ZzCgDh1.8 | Hernandez-Velazquez et al. (2005) | 5         | 1.5     | 42                  |
| ZcCgDh4.7 | Hernandez-Velazquez et al. (2005) | 6         | 1.9     | 48                  |
| ZcwCo1    | Hoffman et al. (2007)             | 6         | 1.9     | 48                  |

**Supplementary Table 11: Microsatellite loci of the Southern elephant seal.** “Multiplex” denotes the PCR mastermix into which each locus was multiplexed, “Mg” denotes the concentration of magnesium used in the PCR mastermix and “T<sub>a</sub>” denotes the annealing temperature used. Loci not assigned to PCR multiplexes were amplified individually.

Allen, P. J., W. Amos, P. P. Pomeroy, and S. D. Twiss. 1995. “Microsatellite Variation in Grey Seals (*Halichoerus grypus*) Shows Evidence of Genetic Differentiation between Two British Breeding Colonies.” *Molecular Ecology* 4 (6): 653–62. <https://doi.org/10.1111/j.1365-294X.1995.tb00266.x>.

Buchanan, F. C., L. D. Maiers, T. D. Thue, B. G. De March, and R. E. Stewart. 1998. “Microsatellites from the Atlantic Walrus *Odobenus rosmarus rosmarus*.” *Molecular Ecology* 7 (8): 1083–85. <http://dx.doi.org/10.1046/j.1365-294X.1998.00401.x>.

Davis, C. S., T. S. Gelatt, D. Siniff, and C. Strobeck. 2002. “Dinucleotide Microsatellite Markers from the Antarctic Seals and Their Use in Other Pinnipeds.” *Molecular Ecology Notes* 2 (3): 203–8. <https://doi.org/10.1046/j.1471-8286.2002.00187.x-i2>.

Hernandez-Velazquez, F. D., C. E. Galindo-Sanchez, M. I. Taylor, J. De La Rosa-Velez, I. M. Cote, Y. Schramm, D. Auriolos-Gamboa and C. Rico. 2005. “New polymorphic microsatellite markers for California sea lions (*Zalophus californianus*).” *Molecular Ecology Notes* 5(1): 140-2. <https://doi.org/10.1111/j.1471-8286.2004.00858.x>.

Hoffman, J. I., S. Steinfartz and J. B. W. Wolf. 2007. “Ten novel dinucleotide microsatellite loci cloned from the Galapagos sea lion (*Zalophus californianus wollebaeki*) are polymorphic in other pinniped species.” *Molecular Ecology Notes* 7(1): 103-5. <https://doi.org/10.1111/j.1471-8286.2006.01544.x>.

Hoffman, J. I., K. K. Dasmahapatra and H. J. Nichols. 2008. “Ten novel polymorphic dinucleotide microsatellite loci cloned from the Antarctic fur seal *Arctocephalus gazella*.” *Molecular Ecology Resources* 8(2): 459-61. <https://doi.org/10.1111/j.1471-8286.2007.01993.x>.

Huebinger, R. M., E. E. Louis, T. Gelatt, L. D. Rea and J. W. Bickham. 2007. "Characterization of eight microsatellite loci in Steller sea lions (*Eumetopias jubatus*).” *Molecular Ecology Notes* 7(6): 1097-99.

<https://doi.org/10.1111/j.1471-8286.2007.01790.x>.

Sanvito, S., A. Fabiani and F. Galimberti. 2014. "Sex Determination in the Near Threatened Guadalupe Fur Seal: Molecular Markers and Their Potential Applications.” *Open Journal of Animal Sciences* 4: 270-7.

<http://dx.doi.org/10.4236/ojas.2014.45034>.

Schuelke, M. 2000. "An economic method for the fluorescent labeling of PCR fragments.” *Nature Biotechnology* 18(2): 233-4. <http://dx.doi.org/10.1038/72708>.

## Guadalupe fur seal

A total of 224 *Arctocephalus townsendii* samples were collected from pups of the main breeding colony of the species, Isla Guadalupe (Baja California, Mexico). Total genomic DNA was extracted from each sample using silica-gel-membrane technology (DNeasy Blood and Tissue kit, Qiagen; details in Sanvito et al. 2014) and genotyped at 15 microsatellite loci (see Supplementary Table 12 for details). Amplification by PCR was carried out using the “universal tag” method of Schuelke (2000). The following PCR profile was used: one cycle of 3 min at 94 °C; 30 cycles of 30 s at 94 °C, 30 s at T<sub>a</sub> °C and 40 s at 72 °C; 8 cycles of 30 s at 94 °C, 30 s at 47 °C and 40 s at 72 °C; and one final cycle of 10 min at 72 °C (see Table 12 for T<sub>a</sub>). Magnesium concentration used in the PCR mastermix was different for the different primers, as detailed in Table 12. Fluorescently labelled PCR products were resolved by electrophoresis on an ABI 3730xl capillary sequencer and allele sizes were scored automatically using GeneMarker v1.85. To ensure high genotype quality, all traces were manually inspected and any incorrect call was adjusted accordingly.

| Locus     | Literature source                 | Mg (mM) | T <sub>a</sub> (°C) |
|-----------|-----------------------------------|---------|---------------------|
| 71HDZ2x   | Huebinger et al. (2007)           | 1       | 45                  |
| 71HDZ301  | Huebinger et al. (2007)           | 2       | 57                  |
| 71HDZ441  | Huebinger et al. (2007)           | 1.5     | 56                  |
| 71HDZ5A   | Huebinger et al. (2007)           | 1.5     | 56                  |
| 71HDZ5x   | Huebinger et al. (2007)           | 1.5     | 50                  |
| Ag-10     | Hoffman et al. (2008)             | 1.5     | 56                  |
| Ag-4      | Hoffman et al. (2008)             | 1.75    | 54                  |
| Ag-7      | Hoffman et al. (2008)             | 1.5     | 56                  |
| ZcCgDh7tg | Hernandez-Velazquez et al. (2005) | 2       | 54                  |
| ZcwA05    | Hoffman et al. (2007)             | 1.5     | 53                  |
| ZcwA12    | Hoffman et al. (2007)             | 2       | 54                  |
| ZcwE03    | Wolf et al. (2006)                | 1.5     | 56                  |
| ZcwE12    | Hoffman et al. (2007)             | 1.5     | 54                  |
| ZcwG04    | Hoffman et al. (2007)             | 1.5     | 53                  |
| ZzCgDh5.8 | Hernandez-Velazquez et al. (2005) | 1       | 47                  |

**Supplementary Table 12: Microsatellite loci of the Guadalupe fur seal.** “Mg” denotes the concentration of magnesium used in the PCR mastermix and “T<sub>a</sub>” denotes the annealing temperature used.

- Hernandez-Velazquez, F. D., C. E. Galindo-Sanchez, M. I. Taylor, J. De La Rosa-Velez, I. M. Cote, Y. Schramm, D. Auriolos-Gamboa and C. Rico. 2005. “New polymorphic microsatellite markers for California sea lions (*Zalophus californianus*).” *Molecular Ecology Notes* 5(1): 140-2. <https://doi.org/10.1111/j.1471-8286.2004.00858.x>.
- Hoffman, J. I., S. Steinfartz and J. B. W. Wolf. 2007. “Ten novel dinucleotide microsatellite loci cloned from the Galapagos sea lion (*Zalophus californianus wollebaeki*) are polymorphic in other pinniped species.” *Molecular Ecology Notes* 7(1): 103-5. <https://doi.org/10.1111/j.1471-8286.2006.01544.x>.
- Hoffman, J. I., K. K. Dasmahapatra and H. J. Nichols. 2008. “Ten novel polymorphic dinucleotide microsatellite loci cloned from the Antarctic fur seal *Arctocephalus gazella*.” *Molecular Ecology Resources* 8(2): 459-61. <https://doi.org/10.1111/j.1471-8286.2007.01993.x>.
- Huebinger, R. M., E. E. Louis, T. Gelatt, L. D. Rea and J. W. Bickham. 2007. “Characterization of eight microsatellite loci in Steller sea lions (*Eumetopias jubatus*).” *Molecular Ecology Notes* 7(6): 1097-99. <https://doi.org/10.1111/j.1471-8286.2007.01790.x>.
- Sanvito, S., A. Fabiani and F. Galimberti. 2014. “Sex Determination in the Near Threatened Guadalupe Fur Seal: Molecular Markers and Their Potential Applications.” *Open Journal of Animal Sciences* 4: 270-7. <http://dx.doi.org/10.4236/ojas.2014.45034>.
- Schuelke, M. 2000. “An economic method for the fluorescent labeling of PCR fragments.” *Nature Biotechnology* 18(2): 233-4. <http://dx.doi.org/10.1038/72708>.
- Wolf, J., D. Tautz, A. Caccone and S. Steinfartz. 2006. Development of new microsatellite loci and evaluation of loci from other pinniped species for the Galápagos sea lion (*Zalophus californianus wollebaeki*). *Conservation Genetics* 7(3): 461-5. <http://dx.doi.org/10.1007/s10592-005-9045-1>.

## Galápagos sea lion

A total of 781 samples of *Zalophus wollebaeki* pups were collected as part of a long-term study on the Galápagos islet of Caamaño (0.45\_S, 90.16\_W) during 2003–2010 inclusive (Wolf *et al.* 2005). Small skin samples were obtained during capture under permission of the Galápagos National Park (PC-001-03 Ext 01, 02, 03-06, 06-08 and PC-043-09). Tissue was stored in 100% ethanol and DNA was subsequently extracted using a DNeasy® tissue kit from Qiagen™. 22 microsatellite loci were PCR amplified and genotyped in four multiplex reactions on an ABI 3730XL capillary sequencer as specified in Supplementary Table 13 using the Qiagen™ Multiplex PCR kit (for details see Wolf *et al.* (2006) and Hoffman *et al.* (2007)). Genotypes were scored automatically with the MegaBACE® Genetic Profiler and GeneMarker software. To ensure consistency and high quality of genotypes, replicate samples were included for each 96 well plates and all traces were manually curated. A subset of the data has been used in previous studies including (Wolf *et al.* 2007, 2008; Wolf & Trillmich 2008; Pörschmann *et al.* 2010; Lenz *et al.* 2013).

| Locus     | Literature source                        | Multiplex | T <sub>a</sub> (°C) |
|-----------|------------------------------------------|-----------|---------------------|
| ZcwAo5    | Hoffman <i>et al.</i> (2007)             | 1         | 60                  |
| ZcwA12    | Hoffman <i>et al.</i> (2007)             | 1         | 60                  |
| ZcwDo1    | Wolf <i>et al.</i> (2006)                | 1         | 60                  |
| ZcwEo5    | Wolf <i>et al.</i> (2007)                | 1         | 60                  |
| Hg4.2.    | Allen <i>et al.</i> (1995)               | 1         | 60                  |
| SGPv9     | Allen <i>et al.</i> (1995)               | 1         | 60                  |
| ZcwAo7    | Wolf <i>et al.</i> (2006)                | 2         | 60                  |
| ZcwBo9    | Wolf <i>et al.</i> (2006)                | 2         | 60                  |
| ZcwCo3    | Wolf <i>et al.</i> (2006)                | 2         | 60                  |
| ZcwC11    | Wolf <i>et al.</i> (2006)                | 2         | 60                  |
| ZcwDo2    | Wolf <i>et al.</i> (2006)                | 2         | 60                  |
| ZcwHo9    | Wolf <i>et al.</i> (2006)                | 2         | 60                  |
| ZcCgDh5.8 | Hernandez-Velazquez <i>et al.</i> (2005) | 2         | 60                  |
| ZcwEo3    | Wolf <i>et al.</i> (2006)                | 3         | 60                  |
| ZcwFo7    | Hoffman <i>et al.</i> (2007)             | 3         | 60                  |
| Hg6.1     | Allen <i>et al.</i> (1995)               | 3         | 60                  |
| Hg8.10    | Allen <i>et al.</i> (1995)               | 3         | 60                  |
| ZcCgDh7tg | Hernandez-Velazquez <i>et al.</i> (2005) | 3         | 60                  |
| ZcwBo7    | Hoffman <i>et al.</i> (2007)             | 4         | 60                  |
| ZcwEo4    | Hoffman <i>et al.</i> (2007)             | 4         | 60                  |
| ZcwE12    | Hoffman <i>et al.</i> (2007)             | 4         | 60                  |
| SGPv11    | Goodman SJ (1997)                        | 4         | 60                  |

Supplementary Table 13: Microsatellite loci of the Galápagos sea lion. “Multiplex” denotes the PCR mastermix into which each locus was multiplexed and “T<sub>a</sub>” denotes the annealing temperature used.

## Bibliography

Allen PJ, Amos W, Pomeroy PP, Twiss SD (1995) Microsatellite variation in grey seals (*Halichoerus grypus*) shows evidence of genetic differentiation between two British breeding colonies. *Molecular Ecology*, 4, 653–662.

Goodman SJ (1997) Dinucleotide repeat polymorphisms at seven anonymous microsatellite loci cloned from the European Harbour Seal (*Phoca vitulina vitulina*). *Animal Genetics*, 28, 310–311.

Hernandez-Velazquez FD, Galindo-Sanchez CE, Taylor MI *et al.* (2005) New polymorphic microsatellite markers for California sea lions (*Zalophus californianus*). *Molecular Ecology Notes*, 5, 140–142.



- Hoffman JI, Steinfartz S, Wolf JBW (2007) Ten novel dinucleotide microsatellite loci cloned from the Galápagos sea lion (*Zalophus californianus wollebaeki*) are polymorphic in other pinniped species. *Molecular Ecology Notes*, 7, 103–105.
- Lenz TL, Mueller B, Trillmich F, Wolf JBW (2013) Divergent allele advantage at MHC-DRB through direct and maternal genotypic effects and its consequences for allele pool composition and mating. *Proceedings of the Royal Society B: Biological Sciences*, 280, 20130714.
- Pörschmann U, Trillmich F, Müller B, Wolf JBW (2010) Male reproductive success and its behavioural correlates in a polygynous mammal, the Galápagos sea lion (*Zalophus wollebaeki*). *Molecular Ecology*, 19, 2574–2586.
- Wolf JBW, Harrod C, Brunner S *et al.* (2008) Tracing early stages of species differentiation: Ecological, morphological and genetic divergence of Galapagos sea lion populations. *BMC Evolutionary Biology*, 8, 150.
- Wolf JBW, Kauermann G, Trillmich F (2005) Males in the shade: habitat use and sexual segregation in the Galápagos sea lion (*Zalophus californianus wollebaeki*). *Behavioral Ecology and Sociobiology*, 59, 293–302.
- Wolf JBW, Tautz D, Caccone A, Steinfartz S (2006) Development of new microsatellite loci and evaluation of loci from other pinniped species for the Galápagos sea lion (*Zalophus californianus wollebaeki*). *Conservation Genetics*, 7, 461–465.
- Wolf JBW, Tautz D, Trillmich F (2007) Galápagos and Californian sea lions are separate species: genetic analysis of the genus *Zalophus* and its implications for conservation management. *Frontiers in Zoology*, 4:20, 1–13.
- Wolf JBW, Trillmich F (2008) Kin in space. Social viscosity in a spatially and genetically sub-structured network. *Proceedings Of The Royal Society B-Biological Sciences*, 275, 2063–2069.
